# Supplementary material for: The anti-inflammatory cytokine response characterized by elevated interleukin-10 is a stronger predictor of severe disease and poor outcomes than the pro-inflammatory cytokine response in coronavirus disease 2019 (COVID-19)
Source: publisher site journal article supplement (doi:10.1515/cclm-2020-1284), 2020-11-26
Supplement: Supplementary file 1 [file j_cclm-2020-1284_suppl.docx]

| **Severity** | **Ordinal**  **Scale** | **Description** |
| --- | --- | --- |
| **Mild** | 1 | Not hospitalized/ambulatory, no limitations of activities. |
| 2 | Not hospitalized/ambulatory, limitation of activities. |
| **Moderate** | 3 | Hospitalized, not requiring oxygen therapy. |
| 4 | Hospitalized, requiring supplemental oxygen by mask or nasal cannula. |
| **Severe** | 5 | Hospitalized, on non-invasive ventilation or high flow oxygen devices, or requiring intensive care unit admission. |
| 6 | Hospitalized, on invasive mechanical ventilation. |
| 7 | Mechanically ventilated and suffering from multi-organ dysfunction syndrome requiring vasopressors or extracorporeal membrane oxygenation (ECMO) or renal replacement therapy. |
| 8 | Death. |

**Supplemental Table 1. COVID-19 severity classification employed in this study.**
